# Supplementary material
Source: Elsevier journal article supplement (http://www.natap.org/2012/HCV/mmc1.pdf)
Supplement: mmc1 [file mmc1.pdf]

## Supplementary webappendix

This webappendix formed part of the original submission and has been peer reviewed. We post it as supplied by the authors.

Supplement to: Pearlman BL. Protease inhibitors for the treatment of chronic hepatitis C genotype-1 infection: the new standard of care. *Lancet Infect Dis* 2012; published online May 29. DOI:10.1016/S1473-3099(12)70060-9.

**Supplemental Table 1:  
Definitions of terms commonly used in hepatitis C Virus therapy**

- **Complete Early Virologic Response (cEVR)** = undetectable serum HCV RNA after 12 weeks of therapy
- **Early Responder** = For BOC-treated patients, undetectable serum HCV RNA at weeks 8 through 24
- **Extended Rapid Virologic Response (eRVR)** = For TVR-treated patients, undetectable serum HCV RNA at weeks 4 and 12 of therapy.
- **Futility rules** = Points at which therapy should be stopped, since there is little to no chance of viral elimination if treatment is continued.
  - For BOC,  $\geq 100$  IU/ml HCV RNA at week 12
  - For TVR,  $\geq 1,000$  IU/ml HCV RNA at week 4 or week 12
  - For BOC or TVR, detectable HCV RNA at week 24
- **Interferon-sensitive** = Relative to baseline HCV RNA, greater than equal to one-half log or one-log drop at 4 weeks of PEG-IFN/RBV therapy (the lead-in phase)
- **Late responder** = For BOC-treated patients, detectable serum HCV RNA at week 8 but undetectable serum HCV RNA at week 24
- **Lead-In Phase** = Four weeks of PEG-IFN/RBV prior to initiation of a protease inhibitor. Indicated for BOC-treated patients
- **Non-responder** = A generic term applied to patients who do not achieve sustained virologic response. Includes relapsers, partial responders and null responders
- **Null responder** = Non-responding patient to prior PEG-IFN/RBV who achieved less than a 2-log<sub>10</sub> decrement in serum HCV RNA at 12 weeks relative to a baseline value; among the toughest to retreat among non-responders
- **Partial responder** = Non-responding patient on prior PEG-IFN/RBV therapy who achieved at least a 2-log<sub>10</sub> decrement in serum HCV RNA at 12 weeks relative to a baseline value, but who had detectable viremia at week 24 of therapy
- **Relapser** = Non-responding patient on prior PEG-IFN/RBV therapy who achieved undetectable serum HCV RNA at the end of therapy, yet whose virus became detectable 24 weeks later when determining ultimate sustained virologic response. Among non-responding patients, these patients are relatively easy to retreat
- **Response-Guided Therapy (RGT)** = If patients achieve certain (early) therapeutic milestones, they may qualify for shorted-duration treatment (q.v. extended RVR)
- **Sustained Virologic Response** = Undetectable serum HCV RNA 24 weeks after therapy is complete; tantamount to cure

---

HCV = hepatitis C virus; BOC = boceprevir; TVR = telaprevir;  
PEG-IFN/RBV = peginterferon and ribavirin combination therapy

**Supplemental Table 2:  
Drug-drug interactions with boceprevir and telaprevir**

| <b>Analgesic</b>              | B | T | <b>Erectile Dysfunction</b>             | B | T |
|-------------------------------|---|---|-----------------------------------------|---|---|
| Buphenophine                  | 1 | 2 | Sildenafil*                             | 1 | 1 |
| Methadone                     | 1 | 1 | Tadalafil*                              | 1 | 1 |
| <b>Antiarrhythmic/Cardiac</b> | B | T | Vardenafil                              | 1 | 1 |
| Amiodarone                    | 1 | 1 | <b>Herbal</b>                           | B | T |
| Digoxin                       | 1 | 1 | St. John's Wort<br>( <i>Hypericum</i> ) | ! | ! |
| Flecainide                    | 1 | 1 | <b>HIV drugs</b>                        | B | T |
| Lidocaine                     | 2 | 1 | Atazanavir                              | 1 | 1 |
| Propafenone                   | 1 | 1 | Darunavir                               | 1 | 1 |
| Quinidine                     | 1 | 1 | Delavirdine                             | 2 | 2 |
| Warfarin                      | 1 | 1 | Efavirenz                               | 1 | 1 |
| <b>Antibiotic</b>             | B | T | Etravirine                              | 2 | 2 |
| Clarithromycin                | 1 | 1 | Fosamprenavir                           | 1 | 1 |
| Erythromycin                  | 2 | 1 | Indinavir                               | 1 | 2 |
| Rifabutin                     | 1 | 1 | Lopinavir                               | 1 | 1 |
| Rifampin                      | ! | ! | Maraviroc                               | 2 | 2 |
| <b>Anticonvulsant</b>         | B | T | Nelfinavir                              | 2 | 2 |
| Carbamazepine                 | ! | 1 | Nevirapine                              | 2 | 2 |
| Phenobarbital                 | ! | 1 | Rilpivirine                             | 2 | 2 |
| Phenytoin                     | ! | 1 | Ritonavir                               | 1 | 1 |
| <b>Antidepressant</b>         | B | T | Saquinavir                              | 1 | 2 |

|                                |   |   |                           |    |   |
|--------------------------------|---|---|---------------------------|----|---|
| Desipramine                    | 1 | 1 | Tenofovir                 | 2  | 1 |
| Escitalopram                   | 2 | 1 | Zidovudine                | 1  | 1 |
| Trazadone                      | 1 | 1 | <b>Immuno-suppressant</b> | B  | T |
| <b>Antifungal</b>              | B | T | Cyclosporine              | 1  | 1 |
| Itraconazole                   | 1 | 1 | Sirolimus                 | 1  | 1 |
| Ketoconazole                   | 1 | 1 | Tacrolimus                | 1  | 1 |
| Posaconazole                   | 1 | 1 | <b>Lipid lowering</b>     | B  | T |
| Voriconazole                   | 1 | 1 | Atorvastatin              | 1† | 1 |
| <b>Anxiolytic/Sleep</b>        | B | T | Lovastatin                | !  | ! |
| Alprazolam                     | 1 | 1 | Simvastatin               | !  | ! |
| Midazolam (oral)               | ! | ! | <b>Migraine</b>           | B  | T |
| Midazolam (parenteral)         | 1 | 1 | Dihydroergotamine         | !  | ! |
| Triazolam                      | ! | ! | Ergonovine                | !  | ! |
| Zolpidem                       | 2 | 1 | Ergotamine                | !  | ! |
| <b>Bronchodilator</b>          | B | T | Methylergonovine          | !  | ! |
| Salmeterol                     | 1 | 1 | <b>Miscellaneous</b>      | B  | T |
| <b>Calcium Channel Blocker</b> | B | T | Alfuzosin                 | !  | ! |
| Amlodopine                     | 2 | 1 | Bosentan                  | 1  | 2 |
| Diltiazem                      | 2 | 1 | Cisapride                 | !  | ! |
| Felodopine                     | 1 | 1 | Colchicine                | 1  | 1 |
| Nicardipine                    | 1 | 1 | Neuroleptic               | B  | T |
| Nifedipine                     | 1 | 1 | Clozapine                 | 2  | 2 |
| Nisoldipine                    | 2 | 1 | Lurasidone                | 2  | 2 |

|                   |   |   |                    |   |   |
|-------------------|---|---|--------------------|---|---|
| Verapamil         | 2 | 1 | Pimozide           | ! | ! |
| Contraceptive     | B | T | Steroid            | B | T |
| Drospirenone      | ! | 2 | Budesonide         | 1 | 1 |
| Ethinyl estradiol | 1 | 1 | Dexamethasone      | 1 | 1 |
| Norethindrone     | 2 | 1 | Fluticasone        | 1 | 1 |
|                   |   |   | Methylprednisolone | 2 | 1 |
|                   |   |   | Prednisone         | 2 | 1 |

B = boceprevir; T = telaprevir; 1 = potential interaction; 2 = predicted potential interaction but not within product label; ! = absolute contraindication;  
 \* = absolutely contraindicated with doses used for pulmonary arterial hypertension;  
 † = may be used in doses up to 20 milligrams daily
